# Supplementary material for: VPS35 pathogenic mutations confer no dominant toxicity but partial loss of function in Drosophila and genetically interact with parkin
Source: PubMed Central journal article supplement (PMC4599670; doi:10.1093/hmg/ddv322), 2015-08-06
Supplement: supp_ddv322_ddv322supp.pdf [file supp_ddv322_ddv322supp.pdf]

# Supplementary Figure 1

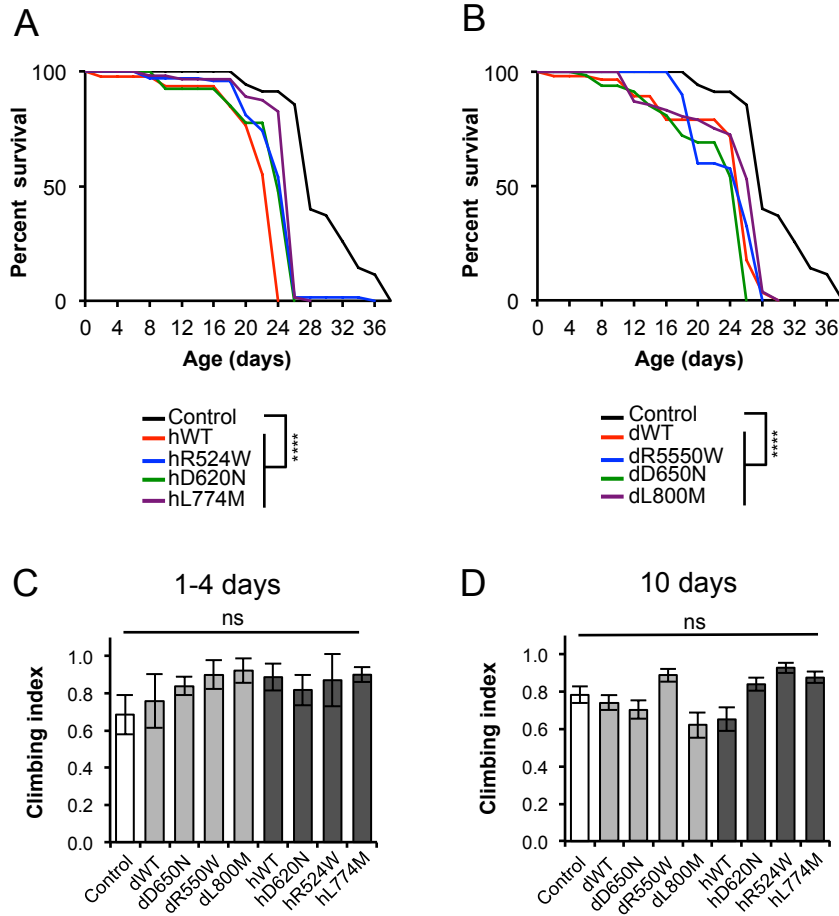

No dominant toxicity of human or *Drosophila* Vps35 variants raised at 29°C. (A, B) Ubiquitous transgene expression via *da-GAL4* modestly shortens lifespan but is affected similarly by all Vps35 variants (\*\*\*\*  $P < 0.0001$ ,  $n = 40-100$  animals). (C, D) Transgene expression does not affect climbing ability with age (all not significant (ns) compared to control).  $n = 15-30$  (C), 35-55 (D). Histograms show mean  $\pm$  s.e.m. Statistical analysis was Log-rank test for lifespan and one-way ANOVA with Bonferroni correction for climbing. Control genotypes are heterozygous *GAL4* driver line alone.
